# Supplementary material
Source: publisher figshare collection journal article supplement (https://frontiersin.figshare.com/ndownloader/files/34793407)
Supplement: Supplementary file [file 34793407]

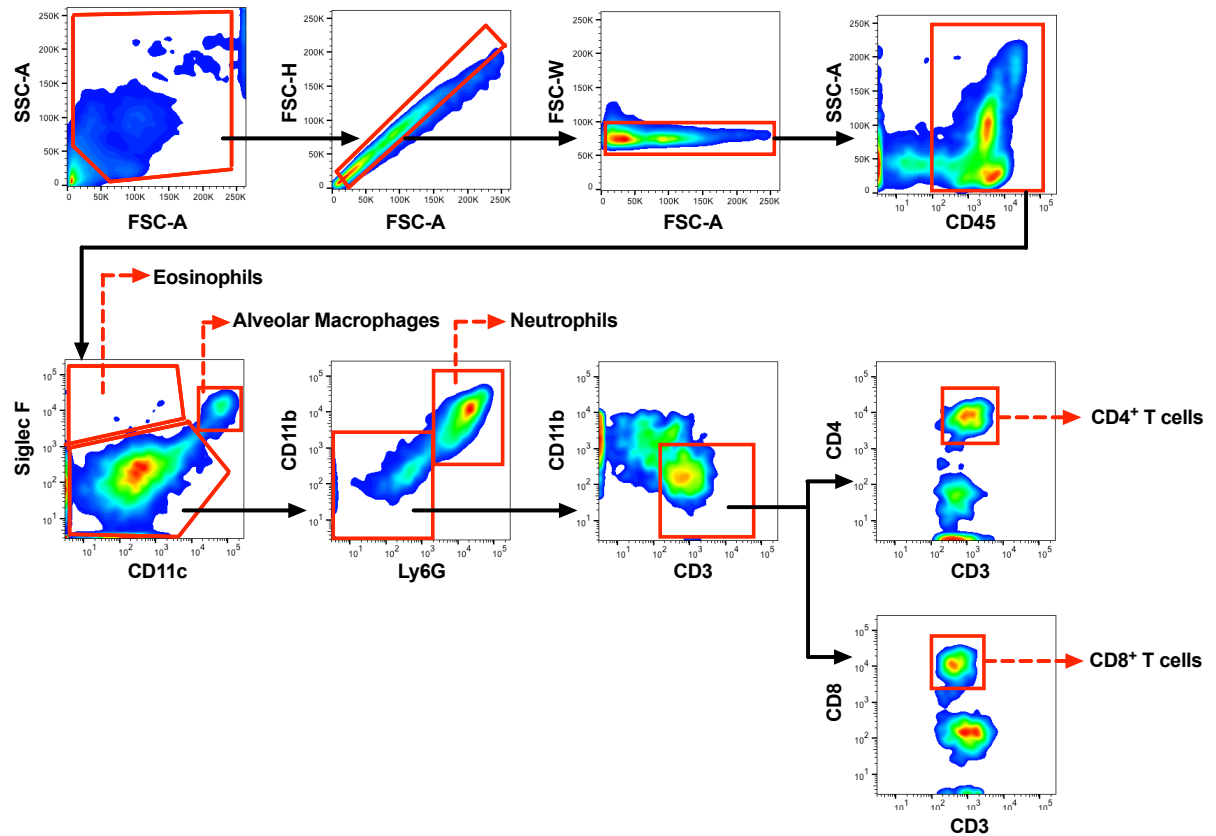

**Supplementary Figure 1. Gating strategy for the identification of immune cells in BALF.** BALF cells were stained using the antibodies described in Supplementary Table 1 and analyzed by flow cytometry. Alveolar macrophages were gated as CD45<sup>+</sup> Siglec-F<sup>+</sup> CD11c<sup>+</sup> cells, eosinophils as CD45<sup>+</sup> Siglec-F<sup>+</sup> CD11c<sup>-</sup> cells, neutrophils as CD45<sup>+</sup> Siglec-F<sup>-/lo</sup> CD11c<sup>-/lo</sup> CD11b<sup>+</sup> Ly6G<sup>+</sup> cells, CD4<sup>+</sup> T-cells as CD45<sup>+</sup> Siglec-F<sup>-/lo</sup> CD11c<sup>-/lo</sup> CD11b<sup>-/lo</sup> Ly6G<sup>-/lo</sup> CD3<sup>+</sup> CD4<sup>+</sup> cells, and CD8<sup>+</sup> T-cells as CD45<sup>+</sup> Siglec-F<sup>-/lo</sup> CD11c<sup>-/lo</sup> CD11b<sup>-/lo</sup> Ly6G<sup>-/lo</sup> CD3<sup>+</sup> CD8<sup>+</sup> cells.

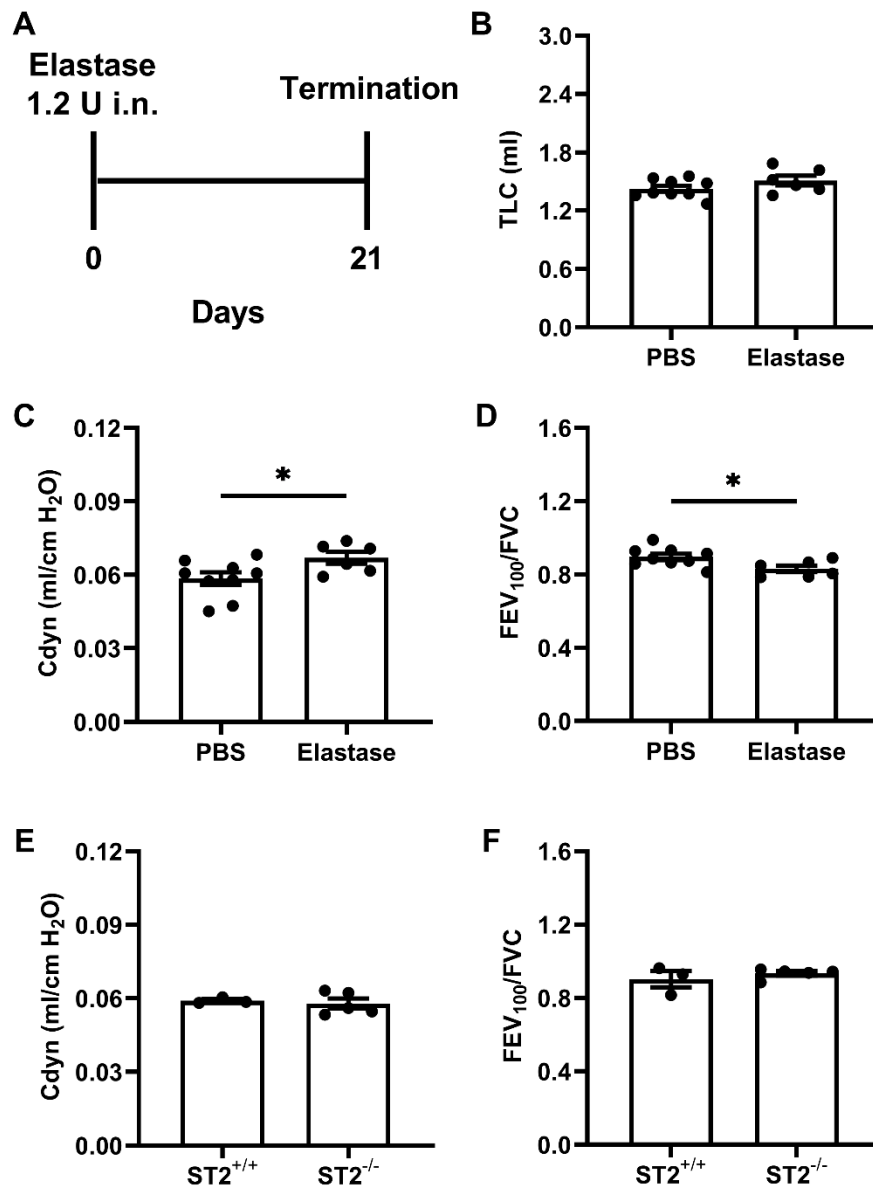

**Supplementary Figure 2. A single elastase instillation causes slightly increased Cdyn and decreased FEV<sub>100</sub>/FVC independently the ST2 receptor.** (A) Mice received a single elastase or PBS administration and were analyzed 21 days later. (B) TLC, (C, E) Cdyn, and (D, F) FEV<sub>100</sub>/FVC were determined. The data are shown as means  $\pm$  SEM. Data in (B-D) were obtained from 6-9 mice per group pooled from 2 individual experiments, and in (E, F) from 3-5 mice per group pooled from 2 individual experiments. Statistical significance was tested by unpaired Student's t-test. \*  $p < 0.05$ .

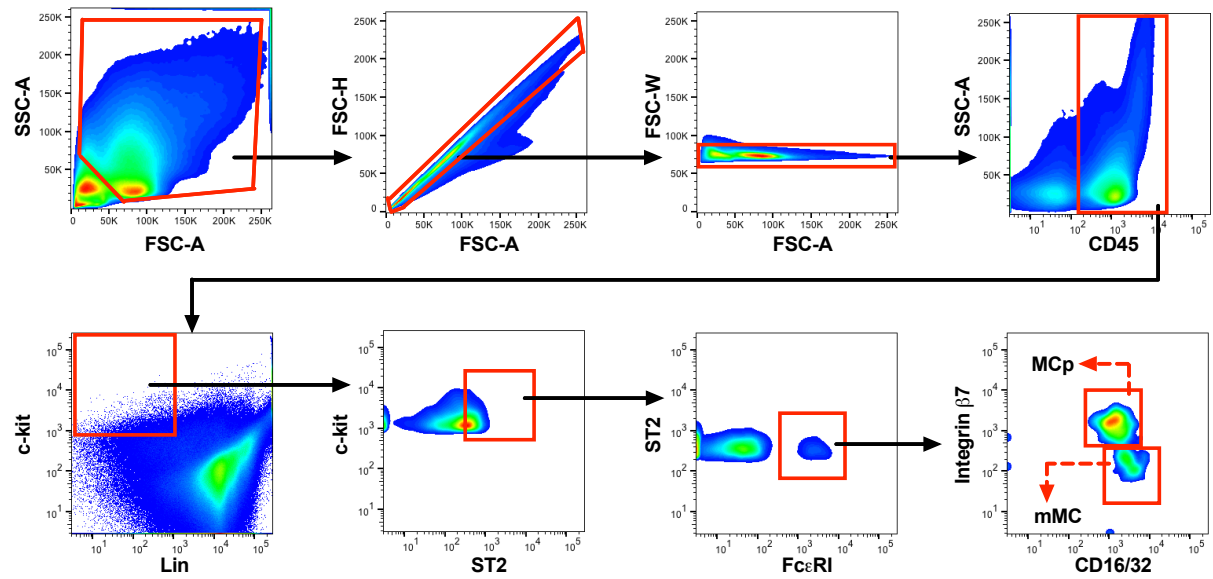

**Supplementary Figure 3. Gating strategy for the identification of mature MCs and MC progenitors.** Cells from dissociated lungs were stained using the antibodies described in Supplementary Table 1 and analyzed by flow cytometry. Mature MCs (mMC; CD45<sup>+</sup> Lin<sup>-</sup> c-kit<sup>hi</sup> ST2<sup>+</sup> FcεRI<sup>+</sup> CD16/32<sup>+</sup> Integrin β7<sup>lo</sup> cells) and their progenitors (MCp; CD45<sup>+</sup> Lin<sup>-</sup> c-kit<sup>hi</sup> ST2<sup>+</sup> FcεRI<sup>+</sup> CD16/32<sup>+</sup> Integrin β7<sup>hi</sup>) were identified.

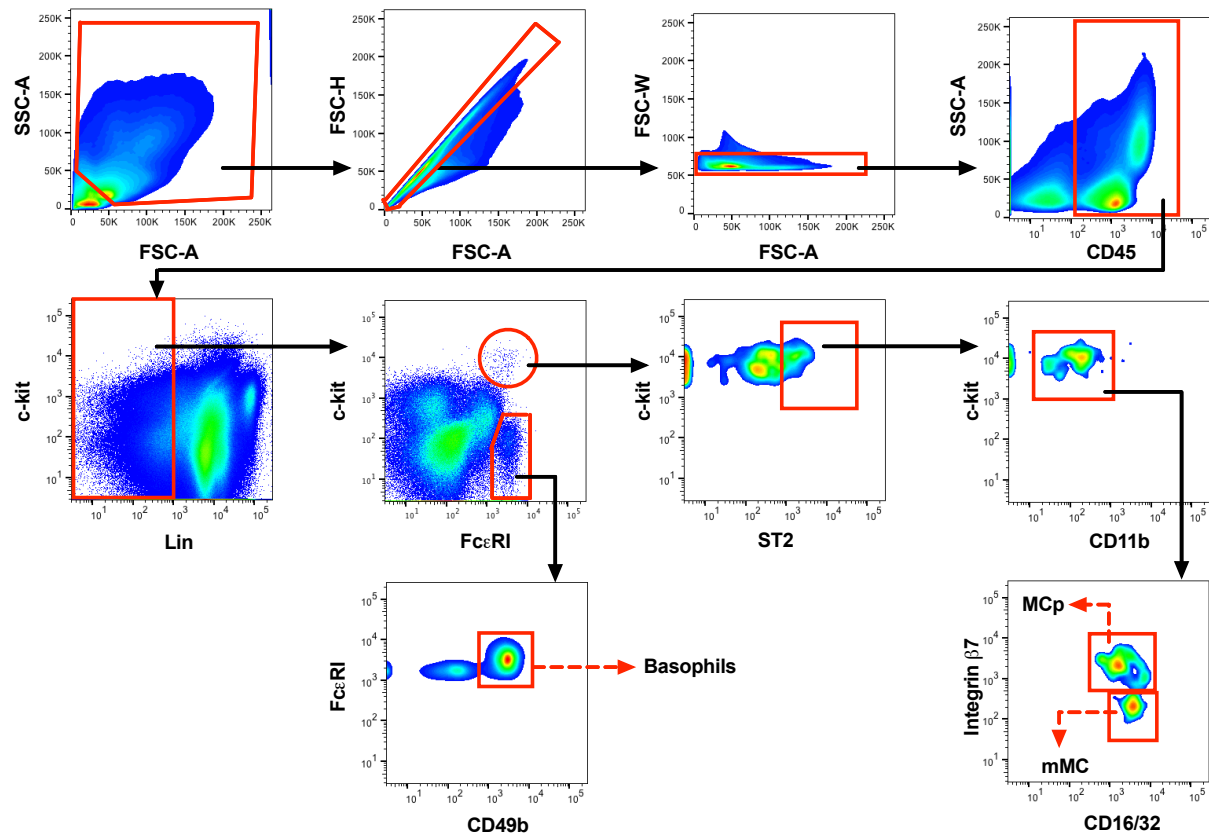

**Supplementary Figure 4. Gating strategy for the identification of mature MCs, MC progenitors, and basophils.** Cells from dissociated lungs were stained using the antibodies described in Supplementary Table 1, and analyzed by flow cytometry. Mature MCs (mMC) were gated as CD45<sup>+</sup> Lin<sup>-</sup> c-kit<sup>hi</sup> CD11b<sup>-</sup> ST2<sup>+</sup> FcεRI<sup>+</sup> CD16/32<sup>+</sup> Integrin β7<sup>lo</sup> cells, MC progenitors (MCp) as CD45<sup>+</sup> Lin<sup>-</sup> c-kit<sup>hi</sup> CD11b<sup>-</sup> ST2<sup>+</sup> FcεRI<sup>+</sup> CD16/32<sup>+</sup> Integrin β7<sup>hi</sup> cells, and basophils as CD45<sup>+</sup> Lin<sup>-</sup> c-kit<sup>+</sup> FcεRI<sup>+</sup> CD49b<sup>+</sup> cells.

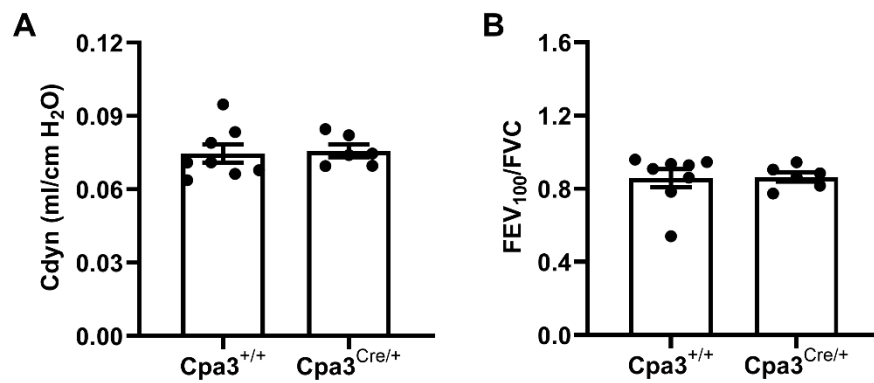

**Supplementary Figure 5. A single elastase instillation causes slightly increased Cdyn and decreased FEV<sub>100</sub>/FVC independently of MCs.** Mice received a single elastase administration and were analyzed 21 days later. **(A)** Cdyn and **(B)** FEV<sub>100</sub>/FVC were determined. The data are shown as means  $\pm$  SEM. Data were obtained from 6-8 mice per group from a single experiment. Statistical significance was tested by unpaired Student's t-test. No statistically significant differences were found.

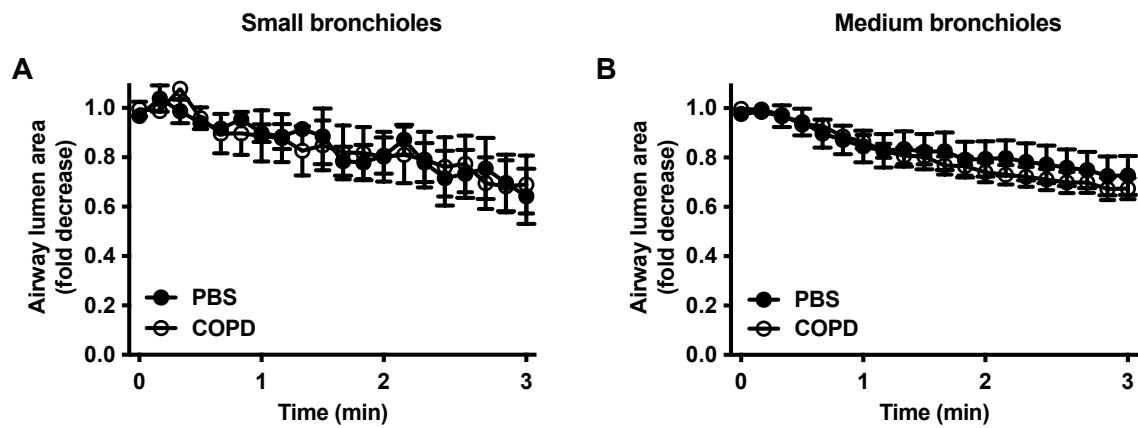

**Supplementary Figure 6. Small- and medium-sized bronchioles from elastase/LPS-treated mice do not show AHR in response to methacholine challenge.** PCLS were obtained from wildtype Balb/c mice subjected to elastase/LPS-induced COPD-like disease or given PBS as control. Time-lapse images of individual bronchioles were recorded every 10 s for 1 min before **(A)** small- ( $<5\,000\,\mu\text{m}^2$  airway lumen area) and **(B)** medium-sized ( $5\,000\text{--}15\,000\,\mu\text{m}^2$  airway lumen area) bronchioles were challenged with methacholine (MCh) and recorded for 3 more min. Airway narrowing after MCh challenge was determined as fold decrease from baseline. Data are shown as means  $\pm$  SEM from **(A)** 6–11 PCLS per group obtained from 3 PBS and 5 COPD mice pooled from four individual experiments, and **(B)** 19–37 PCLS per group obtained from 6 PBS and 10 COPD mice pooled from four individual experiments.

**Supplementary Table 1. List of antibodies used in flow cytometry.**

| Supplementary Figure 1 |                 |            |                |
|------------------------|-----------------|------------|----------------|
| Target molecule        | Fluorochrome    | Clone      | Company        |
| CD3                    | PE              | 17A2       | BD Biosciences |
| CD4                    | PE-Cy5          | GK1.5      | Invitrogen     |
| CD8b                   | BV510           | H35-17.2   | BD Biosciences |
| CD11b                  | FITC            | M1/70      | BD Biosciences |
| CD11c                  | PE-Cy5          | N418       | Invitrogen     |
| CD45                   | Alexa Fluor 700 | 30-F11     | Invitrogen     |
| Ly-6G                  | BV605           | 1A8        | BD Biosciences |
| Siglec-F               | BV421           | E50-2440   | BD Biosciences |
| Supplementary Figure 3 |                 |            |                |
| Target molecule        | Fluorochrome    | Clone      | Company        |
| CD45                   | Alexa Fluor 700 | 30-F11     | Invitrogen     |
| c-kit                  | PE-Cy7          | 2B8        | Invitrogen     |
| Lin: CD3               | PE-Cy5          | 17A2       | BD Biosciences |
| Lin: CD4               | PE-Cy5          | GK1.5      | Invitrogen     |
| Lin: CD19              | PE-Cy5          | 1D3        | Invitrogen     |
| Lin: B220              | PE-Cy5          | RA3-6B2    | Invitrogen     |
| Lin: TER-119           | PE-Cy5          | TER-119    | Invitrogen     |
| Lin: Gr-1              | PE-Cy5          | RB6-8C5    | Invitrogen     |
| Lin: CD8b              | PE-Cy5          | H35-17.2   | Invitrogen     |
| Lin: CD11b             | PE-Cy5          | M1/70      | Invitrogen     |
| ST2                    | BV421           | DIH9       | BioLegend      |
| IgG2a (isotype)        | BV421           | RTK2758    | BioLegend      |
| FceRI                  | PE              | MAR-1      | Invitrogen     |
| IgG (isotype)          | PE              | eBio299Arm | eBioscience    |
| CD16/32                | BV605           | 2.4G2      | BD Biosciences |
| Integrin B7            | FITC            | FIB504     | Invitrogen     |
| Supplementary Figure 4 |                 |            |                |
| Target molecule        | Fluorochrome    | Clone      | Company        |
| CD45                   | Alexa Fluor 700 | 30-F11     | Invitrogen     |
| c-kit                  | PE-Cy7          | 2B8        | Invitrogen     |
| Lin: CD3               | BV510           | 17A2       | BD Biosciences |
| Lin: CD4               | BV510           | GK1.5      | BD Biosciences |
| Lin: CD19              | BV510           | 1D3        | BD Biosciences |
| Lin: B220              | BV510           | RA3-6B2    | BD Biosciences |
| Lin: TER-119           | BV510           | TER-119    | BD Biosciences |
| Lin: Gr-1              | BV510           | RB6-8C5    | BD Biosciences |
| Lin: CD8b              | BV510           | H35-17.2   | BD Biosciences |
| FceRI                  | PE              | MAR-1      | Invitrogen     |
| IgG (isotype)          | PE              | eBio299Arm | eBioscience    |

|                 |        |        |                |
|-----------------|--------|--------|----------------|
| CD11b           | PE-Cy5 | M1/70  | BD Biosciences |
| ST2             | BV786  | U29-93 | BD Biosciences |
| IgG2a (isotype) | BV786  | R35-95 | BD Biosciences |
| CD16/32         | BV605  | 2.4G2  | BD Biosciences |
| Integrin B7     | FITC   | FIB504 | Invitrogen     |
| CD49b           | V450   | DX5    | BD Biosciences |
